# Supplementary material for: Estimating the cost-per-result of a national reflexed Cryptococcal antigenaemia screening program: Forecasting the impact of potential HIV guideline changes and treatment goals
Source: PLoS One. 2017 Aug 22;12(8):e0182154. doi: 10.1371/journal.pone.0182154 (PMC5568734; doi:10.1371/journal.pone.0182154)
Supplement: S2 Table — This template gives an example of how cost-per-result was calculate for typical volumes of LFA and EIA testing using scenario I or status quo, with reference to volumes, quoted test costs, staff costs and exchange rate used. (XLSX) [file pone.0182154.s002.xlsx]

## Sheet: LFA Costing_n=23 (50th Perc)
Samples Per Day	23
			Cost p/Result
Tests Per Annum	5922		78.4759
			Cost
			5.43744
Crytococcal LFA Assay										Workflow Analysis
										Manual	LFA
Assumptions										Samples Per Day	23
										Activity	Total Time
No of CD4 <= 100 samples p/y	5922	Corporate Data Warehouse								Prepare worklist	1.5
Working life, years	5									Find samples	7.5
Annual discount rate	0.04									Prepare tubes	7.5
					Working Days		21,73			Add diluent and controls	11.25
Exclusions					Months		12			Add pat plasma	11.25
Cost of building and electricity		Base Error Rate		1.01						Add test strip	3.375
										10min incubation	10
Staff										Read results, enter wrklist	7.5
										Enter results on LIMS	7.5
Staff type	Number of staff	Grade	Salary p/a (CTC)	Total Cost	% of Time	Salary p/a (CTC)	Source			File samples	7.5
Medical Technologist (Testing)	1	C2	417172	417172	0.184877	77125.4	Intranet	√
Lab Manager (Review)	1	D1	656827	656827	0.0555556	36490.4	Intranet	√		Total Time (min)	74.875
Total				1.074e+06	0.240432	113616				8 Hours	480
										Actual (Lunch 60 and Tea 15)	405
Assets
										Total Time	74.875
Description	Qty	Unit Cost	Total costs	Working life, years	Annual discount rate	Annual equivalent cost	Source
Pipette 40ul	1	2482.24	2482.24	5	0.04	499.757	Labex			Time %	0.184877
Racks	1	423.396	423.396	5	0.04	85.2437	Labex
								√			Time (Mins)
										Review samples (1m p/sample)	23
Total	2	2905.63	2905.63			585.001
										Time %	0.0567901
Reagent Costs
Item	Qty Supplied	Total Cost	Cost p/Unit	Qty Used	Cost ptest	No of Tests p/a	Total Cost p/a	Source
CrAg LFA Kit (Cryptococcal Antigen LFA)	50	2791.8	55.8361	1	55.8361	5922	330661	Hain
PIPETTE TIPS GILSON YELLOW 5-200UL BOX OF 1000	1000	82.707	0.082707	1	0.082707	5922	489.791	PC584037
GAUZE GEM NON WOVEN SWAB 100/Box	100	59.9982	0.599982	0.0243902	0.0146337	5922	86.6608	PC549045
SARSTELT 2ML MICROTUBES 1000/BOX	1000	1675.8	1.6758	1	1.6758	5922	9924.09	P04M0161
GLOVES - LATEX POWDER FREE SMALL (100/BOX)	100	74.1	0.741	0.0731707	0.0542195	5922	321.088	P02G0088
BROTHER HL 5350DN LASER TONER	22	1325.67	60.2578	0.00497512	0.29979	5922	1775.36	P02A1097
A4 PAPER BOND 80 GRMS WHT TYPK (500/Ream)	500	52.0638	0.104128	0.0487805	0.0050794	5922	30.0802	P17S0401
50 LITRE DISPOSAL BOX complete with lid and liner	1	315.666	315.666	0.00110865	0.349962	5922	2072.48	P02H0924
10 LITRE SHARPS	1	87.894	87.894	0.00110865	0.0974435	5922	577.06	P03S0028
Total					58.4157		345938
Summary
Annual Equivalent Costs
		Asset cost per month	Staff cost	Reagent cost	Total costs	Outcome: No of Tests	Cost p/Outcome
		585.001	113616	345938	460139	5922	77.6998
Annual Equivalent Costs including error rate for staffing and reagent costs
		Asset cost	Staff cost	Reagent cost	Total costs	Outcome: No of Tests	Cost p/Outcome
		585.001	114752	349397	464734	5922	78.4759

## Sheet: EIA Costing n=40 (75th Perc)
Samples Per Day	40		Cost p/Result
			78.3361
Tests Per Annum	10386		Cost
			5.42776
Crytococcal EIA Assay: Hain
										Workflow Analysis
Assumptions
										Batch size	40
No of CD4 <= 100 samples p/y	10386	Corporate Data Warehouse									Total Time
Working life, years	5
Annual discount rate	0.04									Prepare worklist	2
					Working Days		21,73			Find samples	5.83333
Exclusions					Months		12			Load plate	2
Cost of building and electricity		Base Error Rate		1.01						Uncap EDTA	0.833333
										Enter LabNo	2.08333
Staff										Load Reagents	15
										Run	5
Staff type	Number of staff	Grade	Salary p/a (CTC)	Total Cost	% of Time	Salary p/a (CTC)	Source			Remove	4.16667
Medical Technologist (Testing)	1	C2	417172	417172	0.162757	67897.8	NHLS Intranet	√		Dispose	2
Lab Manager (Review)	1	D1	656827	656827	0.0987654	64871.8	NHLS Intranet	√		Cleaning	15
										Shut down	2
										Review	10
Total				1.074e+06	0.261523	132770
										Total Time (min)	65.9167
Assets										Total Time (hr)	1.09861
Description	Qty	Unit Cost	Total costs	Working life, years	Annual discount rate	Annual equivalent cost	Source			8 Hours	480
EIA Instrument (Thunderbolt)	1	440029	440029	5	0.04	88592.4	Quotation	√		Actual (Lunch 60 and Tea 15)	405
12 month Service Contract	1	11055.3	11055.3	1	0.04	11055.3	Quotation	√
										Time per Batch	65.9167
										Time %	0.162757
Total	2	451084	451084			99647.7					Time (Mins)
										Review samples (1min p/sample)	40
Reagent Costs
										Time %	0.0987654
Item	Qty Supplied	Total Cost	Cost p/Unit	Qty Used	Cost ptest	No of Tests p/a	Total Cost p/a	Source
EIA Kit	192	10257.4	53.4241	1	53.4241	10386	554863	Quotation
GLOVES - LATEX POWDER FREE SMALL (100/BOX)	100	74.1	0.741	0.0104167	0.00771875	10386	80.1669	P02G0088
BROTHER HL 5350DN LASER TONER	1000	1325.67	1.32567	1	1.32567	10386	13768.4	P02A1097
A4 PAPER BOND 80 GRMS WHT TYPK (500/Ream)	500	52.0638	0.104128	0.0208333	0.00216932	10386	22.5306	P17S0401
50 LITRE DISPOSAL BOX complete with lid and liner	1	315.666	315.666	0.00110865	0.349962	10386	3634.71	P02H0924
10 LITRE SHARPS	1	87.894	87.894	0.00110865	0.0974435	10386	1012.05	P03S0028
Decon Solution (lasts one year)	10386	205.2	0.0197574	1	0.0197574	10386	205.2	Quotation
Distilled Water (20l)	3200	162.336	0.05073	1	0.05073	10386	526.882	Tests
Total					55.2776		574113
Summary of Costs: Annual test volume
Annual Equivalent Costs
		Asset cost per month	Staff cost	Reagent cost	Total costs	Outcome: No of Tests	Cost p/Outcome
		99647.7	132770	574113	806530	10386	77.6555
Annual Equivalent Costs including error rate for staffing and reagent costs
		Asset cost	Staff cost	Reagent cost	Total costs	Outcome: No of Tests	Cost p/Outcome
		99647.7	134097	579854	813599	10386	78.3361

## Sheet: Ref1_Lab_Volumes
						S1=	344506		S2=	63085	0.183117	S3=	238647	0.692722	S4=	537310	1.55965
						Scenario One (Base Case)			Scenario Two			Scenario Three			Scenario Four
#	Testing Lab	2015/16 CD4 <=100	%	CrAg per month (/12)	CrAg per day (/21.73)	S1Annual Vols	S1 p/day (Round Up)	S1 Platform	S2 Annual Vols	S2 p/day	S2 Platform (Round Up)	S3 Annual Vols	S3 p/day (Round Up)	S3 Platform	S4 Annual Vols	S4 p/day (Round Up)	S4 Platform
1	A	24950	0.0724225	2079.17	96	24950	96	EIA	4569	18	LFA	17283.4	67	EIA	38913.4	150	EIA
2	B	17548	0.0509367	1462.33	68	17548	68	EIA	3213.34	13	LFA	12155.9	47	EIA	27368.8	105	EIA
3	C	16590	0.0481559	1382.5	64	16590	64	EIA	3037.92	12	LFA	11492.3	45	EIA	25874.7	100	EIA
4	D	15788	0.0458279	1315.67	61	15788	61	EIA	2891.06	12	LFA	10936.7	42	EIA	24623.8	95	EIA
5	E	14793	0.0429397	1232.75	57	14793	57	EIA	2708.85	11	LFA	10247.4	40	EIA	23072	89	EIA
6	F	14112	0.040963	1176	55	14112	55	EIA	2584.15	10	LFA	9775.7	38	EIA	22009.8	85	EIA
7	G	13190	0.0382867	1099.17	51	13190	51	EIA	2415.32	10	LFA	9137.01	36	EIA	20571.8	79	EIA
8	H	12288	0.0356685	1024	48	12288	48	EIA	2250.15	9	LFA	8512.17	33	LFA	19165	74	EIA
9	H	11826	0.0343274	985.5	46	11826	46	EIA	2165.54	9	LFA	8192.13	32	LFA	18444.5	71	EIA
10	I	11017	0.0319791	918.083	43	11017	43	EIA	2017.4	8	LFA	7631.72	30	LFA	17182.7	66	EIA
11	J	10602	0.0307745	883.5	41	10602	41	EIA	1941.41	8	LFA	7344.24	29	LFA	16535.4	64	EIA
12	K	10386	0.0301475	865.5	40	10386	40	EIA	1901.86	8	LFA	7194.61	28	LFA	16198.6	63	EIA
13	L	10297	0.0298892	858.083	40	10297	40	EIA	1885.56	8	LFA	7132.96	28	LFA	16059.8	62	EIA
14	M	10205	0.0296221	850.417	40	10205	40	EIA	1868.71	8	LFA	7069.23	28	LFA	15916.3	62	EIA
15	N	9341	0.0271142	778.417	36	9341	36	EIA	1710.5	7	LFA	6470.72	25	LFA	14568.7	56	EIA
16	O	8963	0.026017	746.917	35	8963	35	EIA	1641.28	7	LFA	6208.87	24	LFA	13979.2	54	EIA
17	P	8842	0.0256657	736.833	34	8842	34	EIA	1619.12	7	LFA	6125.05	24	LFA	13790.5	53	EIA
18	Q	8236	0.0239067	686.333	32	8236	32	EIA	1508.15	6	LFA	5705.26	22	LFA	12845.3	50	EIA
19	R	7885	0.0228878	657.083	31	7885	31	EIA	1443.88	6	LFA	5462.12	21	LFA	12297.9	48	EIA
20	S	7178	0.0208356	598.167	28	7178	28	LFA	1314.42	6	LFA	4972.36	20	LFA	11195.2	43	EIA
21	T	6931	0.0201187	577.583	27	6931	27	LFA	1269.19	5	LFA	4801.26	19	LFA	10810	42	EIA
22	U	6298	0.0182812	524.833	25	6298	25	LFA	1153.27	5	LFA	4362.77	17	LFA	9822.7	38	EIA
23	V	6246	0.0181303	520.5	24	6246	24	LFA	1143.75	5	LFA	4326.74	17	LFA	9741.6	38	EIA
24	W	5922	0.0171898	493.5	23	5922	23	LFA	1084.42	5	LFA	4102.3	16	LFA	9236.27	36	EIA
25	X	5905	0.0171405	492.083	23	5905	23	LFA	1081.31	5	LFA	4090.53	16	LFA	9209.75	36	EIA
26	Y	5756	0.016708	479.667	23	5756	23	LFA	1054.02	5	LFA	3987.31	16	LFA	8977.37	35	LFA
27	Z	5535	0.0160665	461.25	22	5535	22	LFA	1013.55	4	LFA	3834.22	15	LFA	8632.68	34	LFA
28	AA	5248	0.0152334	437.333	21	5248	21	LFA	960.999	4	LFA	3635.41	14	LFA	8185.06	32	LFA
29	AB	5194	0.0150767	432.833	20	5194	20	LFA	951.111	4	LFA	3598	14	LFA	8100.84	32	LFA
30	AC	4107	0.0119214	342.25	16	4107	16	LFA	752.063	3	LFA	2845.01	11	LFA	6405.5	25	LFA
31	AD	3814	0.0110709	317.833	15	3814	15	LFA	698.409	3	LFA	2642.04	11	LFA	5948.52	23	LFA
32	AE	3805	0.0110448	317.083	15	3805	15	LFA	696.761	3	LFA	2635.81	11	LFA	5934.48	23	LFA
33	AF	3602	0.0104556	300.167	14	3602	14	LFA	659.588	3	LFA	2495.19	10	LFA	5617.87	22	LFA
34	AG	3558	0.0103278	296.5	14	3558	14	LFA	651.531	3	LFA	2464.71	10	LFA	5549.25	22	LFA
35	AH	3396	0.00985759	283	14	3396	14	LFA	621.866	3	LFA	2352.49	10	LFA	5296.58	21	LFA
36	AI	3004	0.00871973	250.333	12	3004	12	LFA	550.084	3	LFA	2080.94	8	LFA	4685.2	18	LFA
37	AJ	2401	0.0069694	200.083	10	2401	10	LFA	439.665	2	LFA	1663.23	7	LFA	3744.73	15	LFA
38	AK	2211	0.00641789	184.25	9	2211	9	LFA	404.872	2	LFA	1531.61	6	LFA	3448.39	14	LFA
39	AL	1907	0.00553546	158.917	8	1907	8	LFA	349.205	2	LFA	1321.02	6	LFA	2974.26	12	LFA
40	AM	1902	0.00552095	158.5	8	1902	8	LFA	348.289	2	LFA	1317.56	6	LFA	2966.46	12	LFA
41	AN	1892	0.00549192	157.667	8	1892	8	LFA	346.458	2	LFA	1310.63	6	LFA	2950.86	12	LFA
42	AO	1551	0.0045021	129.25	6	1551	6	LFA	284.015	2	LFA	1074.41	5	LFA	2419.02	10	LFA
43	AP	1514	0.0043947	126.167	6	1514	6	LFA	277.24	2	LFA	1048.78	5	LFA	2361.32	10	LFA
44	AQ	1423	0.00413055	118.583	6	1423	6	LFA	260.576	1	LFA	985.744	4	LFA	2219.39	9	LFA
45	AR	1369	0.00397381	114.083	6	1369	6	LFA	250.688	1	LFA	948.337	4	LFA	2135.17	9	LFA
46	AS	1310	0.00380255	109.167	6	1310	6	LFA	239.884	1	LFA	907.466	4	LFA	2043.15	8	LFA
47	AT	1233	0.00357904	102.75	5	1233	5	LFA	225.784	1	LFA	854.127	4	LFA	1923.05	8	LFA
48	AU	857	0.00248762	71.4167	4	857	4	LFA	156.932	1	LFA	593.663	3	LFA	1336.62	6	LFA
49	AV	853	0.00247601	71.0833	4	853	4	LFA	156.199	1	LFA	590.892	3	LFA	1330.38	6	LFA
50	AW	744	0.00215961	62	3	744	3	LFA	136.239	1	LFA	515.385	2	LFA	1160.38	5	LFA
51	AX	500	0.00145135	41.6667	2	500	2	LFA	91.5586	1	LFA	346.361	2	LFA	779.827	3	LFA
52	AY	481	0.0013962	40.0833	2	481	2	LFA	88.0794	1	LFA	333.199	2	LFA	750.193	3	LFA
TOTAL		344506	1	28708.8	1347	344506	1347	0	63085.2	269		238647	943		537310	2088

## Sheet: Ref2_CDW Volumes
RPT1005 CCMT Volumes by Test Ranges NHLS->Testing Lab
Report Filter:
(Province <> ZA, Not Applicable, Unknown) And (Province ({Province All Caps}) <> Country ({Country All Caps})) And ({Test Category} = CD4) And ({Fiscal Year} = FY 15/16) And ({Result Range} <> Not Available)
Page by:
Test Category: Cd4
			Fiscal Year	FY 15/16							Total
			Metrics	Tests ARV							Tests ARV
Testing Lab	X	Y`	Result Range	<= 50	> 50 <= 100	> 100 <= 200	> 200 <= 350	> 350 <= 500	> 500	Total	Total_1	<=100
A	-26.2183	28.2444		13665	11285	26353	47687	48689	82560	230239	230239	24950
B	-26.1741	28.0469		9887	7661	16915	28463	26937	42780	132643	132643	17548
C	-25.4756	30.9711		8873	7717	18637	33531	31489	48446	148693	148693	16590
D	-23.8898	29.4613		8913	6875	14758	25890	25322	44012	125770	125770	15788
E	-25.6173	28.0114		8394	6399	13401	23501	24171	41626	117492	117492	14793
F	-26.2601	27.938		8128	5984	12707	21476	21237	35970	105502	105502	14112
G	-26.0101	28.2325		7296	5894	12764	21091	19997	31053	98095	98095	13190
H	-26.8868	26.6177		6201	6087	12959	22499	23052	45012	115810	115810	12288
H	-29.6474	30.3328		6242	5584	14331	31948	39233	76413	173751	173751	11826
I	-23.8735	30.2676		6340	4677	10475	18394	18175	32090	90151	90151	11017
J	-32.996	27.8916		5539	5063	10762	19172	19091	34189	93816	93816	10602
K	-26.5232	29.9752		5408	4978	12539	23764	25005	43114	114808	114808	10386
L	-33.9252	25.5707		5503	4794	10842	17750	16886	28249	84024	84024	10297
M	-29.9548	30.9366		5295	4910	12669	28317	33383	56641	141215	141215	10205
N	-29.717	31.0282		4873	4468	11937	24379	26449	42217	114323	114323	9341
O	-33.9066	18.4147		4622	4341	10133	17963	18628	30514	86201	86201	8963
P	-31.5875	28.7644		4616	4226	9820	18521	19974	38068	95225	95225	8842
Q	-25.7322	28.2031		4580	3656	8666	15455	15923	26114	74394	74394	8236
R	-29.1414	26.2457		4083	3802	8504	15533	15550	26167	73639	73639	7885
S	-27.9846	26.7362		3798	3380	7825	14454	14657	23856	67970	67970	7178
T	-31.36	29.5655		3482	3449	8214	15958	17101	30273	78477	78477	6931
U	-28.7796	31.8641		3527	2771	7160	15977	19456	35398	84289	84289	6298
V	-25.6755	27.2489		3295	2951	6355	10925	10419	16761	50706	50706	6246
W	-33.9421	18.4624		2959	2963	7627	15180	17468	31013	77210	77210	5922
X	-28.7429	24.7697		3114	2791	6508	11240	11763	20742	56158	56158	5905
Y	-30.7435	30.4509		2969	2787	7134	16275	20427	39354	88946	88946	5756
Z	-33.91	18.613		2738	2797	7043	13844	15548	26475	68445	68445	5535
AA	-28.5567	29.7661		2741	2507	6427	14015	16203	27010	68903	68903	5248
AB	-28.1456	31.8807		2946	2248	6386	14183	18260	37427	81450	81450	5194
AC	-27.7584	30.7971		2136	1971	4851	9741	10576	20010	49285	49285	4107
AD	-29.1574	31.0393		1988	1826	4858	10658	12868	22721	54919	54919	3814
AE	-27.7697	30.0543		2040	1765	4445	9630	11104	18481	47465	47465	3805
AF	-28.5095	28.8212		1785	1817	4463	9757	11262	21521	50605	50605	3602
AG	-27.891	31.6393		1778	1780	4412	9070	10637	17694	45371	45371	3558
AH	-29.3328	31.2852		1797	1599	4233	9217	11038	19161	47045	47045	3396
AI	-24.1927	29.0208		1605	1399	2961	5195	5588	10856	27604	27604	3004
AJ	-25.8751	29.2375		1325	1076	2451	4429	4218	6162	19661	19661	2401
AK	-33.9519	22.4503		1053	1158	2768	4853	4901	7486	22219	22219	2211
AL	-26.1688	27.7965		1106	801	1991	3841	4223	7653	19615	19615	1907
AM	-28.212	30.6729		1009	893	2344	4992	5546	7865	22649	22649	1902
AN	-25.7635	28.0899		1174	718	1246	1788	1474	4542	10942	10942	1892
AO	-25.6869	31.4913		872	679	1643	3279	3791	6274	16538	16538	1551
AP	-30.1627	30.0779		683	831	1961	4125	4982	10726	23308	23308	1514
AQ	-26.9859	24.7469		756	667	1423	2533	2988	5877	14244	14244	1423
AR	-31.8988	26.8786		675	694	1408	2434	2300	3417	10928	10928	1369
AS	-28.891	31.4665		705	605	1546	3801	4753	7989	19399	19399	1310
AT	-28.1729	30.2297		641	592	1648	3616	4184	6887	17568	17568	1233
AU	-32.3323	28.1388		468	389	940	1580	1520	2320	7217	7217	857
AV	-22.9947	30.4146		461	392	753	1188	1279	2151	6224	6224	853
AW	-24.5918	31.0598		379	365	690	1404	1593	4078	8509	8509	744
AX	-28.446	21.266		220	280	643	1055	993	1927	5118	5118	500
AY	-30.6599	24.0077		202	279	571	1044	936	1648	4680	4680	481
Excluded	-32.9328	27.7409		60	74	144	315	375	790	1758	1758	134
Excluded	-27.8658	26.2661		26	15	29	33	28	73	204	204	41
Excluded	-26.1839	27.9901		8	5	12	16	20	38	99	99	13
Excluded	-34.0275	18.665		5	2	6	10	7	7	37	37	7
Excluded	-26.1419	28.1496		3	3	2	2	4	8	22	22	6
Excluded	-33.5947	26.8834		2	2	3	1	10	4	22	22	4
Excluded	-28.6499	30.9332		2	1	5	9	12	15	44	44	3
Excluded	-30.5441	29.4128		3		4	4	9	9	29	29	3
Excluded	-28.6167	31.0833		1	2	3	7	8	14	35	35	3
Excluded	-28.6291	31.3408		2	1	5	14	17	21	60	60	3
Excluded	-34.1096	18.8215			1					1	1	1
Excluded	-33.6042	22.1963		1		1	1	2	1	6	6	1
Excluded	-26.1385	28.1255		1		2		6	3	12	12	1
Excluded	-24.1965	29.0143			1	1		1		3	3	1
Excluded	-26.2535	28.0634		1			1		2	4	4	1
Excluded	-29.1173	26.1871			1			3	4	8	8	1
Excluded	-32.9133	17.991			1	1	3	4	9	18	18	1
Excluded	-33.6456	19.4581		1		7	2	1	1	12	12	1
Excluded	-29.8616	31.0423							1	1	1	0
Excluded	-31.662	28.0504					1			1	1	0
Excluded	-32.3529	22.5949					2	1		3	3	0
Excluded	-28.9977	31.4747							1	1	1	0
Excluded	-27.9961	31.3772				1			1	2	2	0
Excluded	-26.2601	27.938					1		1	2	2	0
Excluded	-24.6191	30.173					1	1		2	2	0
Excluded	-24.1965	29.0143						1	1	2	2	0
Excluded	-34.224	19.4332						2		2	2	0
Excluded	-32.1727	26.8052				1			1	2	2	0
Excluded	-31.0813	29.4954							1	1	1	0
Excluded	-29.8566	30.9508					1			1	1	0
Excluded	-34.0356	23.0494					3	4	7	14	14	0
Excluded	-25.8887	25.7068					1		1	2	2	0
Excluded	-23.8865	29.7277				1	2	3	3	9	9	0
Excluded	-28.895	31.1861						1		1	1	0
Excluded	-34.1858	22.1275							1	1	1	0
Excluded	-30.728	30.344						4		4	4	0
Excluded	-28.2266	31.4148				5	4	5	9	23	23	0
Excluded	-29.5749	30.3999						1		1	1	0
Excluded	-33.727	18.97				5	3	4	14	26	26	0
Excluded	-33.9577	25.5968					1	1		2	2	0
Excluded	-30.4878	29.8248						2	3	5	5	0
Excluded	-30.0279	29.8447				1	4	9	18	32	32	0
Excluded	-27.5624	24.7481							3	3	3	0
Excluded	-25.6947	31.7881							1	1	1	0
Excluded	-29.1574	31.0393							2	2	2	0
Excluded	-31.6667	18.5051				1	1			2	2	0
Total				185001	159730	374340	707058	753793	1312058	3491980	3491980	344731

## Sheet: Ref3_CTC
PAY ZONE	2016 Midpoint p/a
B3	250262
C2	417172
D1	656827

## Sheet: Ref4_ER
															14.4325

## Sheet: Ref5_Percentile Volumes
Scenario I Percentile daily CrAg volumes
Percentile	Daily CrAg Volumes	Annual CrAg Volumes	Platform		summ s1pday,detail
5th Percentile	3	744	LFA
10th Percentile	5	1423	LFA		S1 p/day
25th Percentile	8	1907	LFA		-------------------------------------------------------------
50th Percentile	23	5922	LFA		Percentiles Smallest
75th Percentile	40	10386	EIA		1% 2 2
90th Percentile	55	14112	EIA		5% 3 2
95th Percentile	64	16590	EIA		10% 5 3 Obs 52
					25% 8 4 Sum of Wgt. 52
					50% 23 Mean 25.90385
					Largest Std. Dev. 20.64761
					75% 40 61
					90% 55 64 Variance 426.3239
					95% 64 68 Skewness 1.078983
					99% 96 96 Kurtosis 4.024941
